# Supplementary material for: Murine Mesenchymal Stromal Cells Retain Biased Differentiation Plasticity Towards Their Tissue of Origin
Source: MDPI journal article supplement (doi:10.3390/cells9030756), 2020-03-19
Supplement: s1 [file s1]

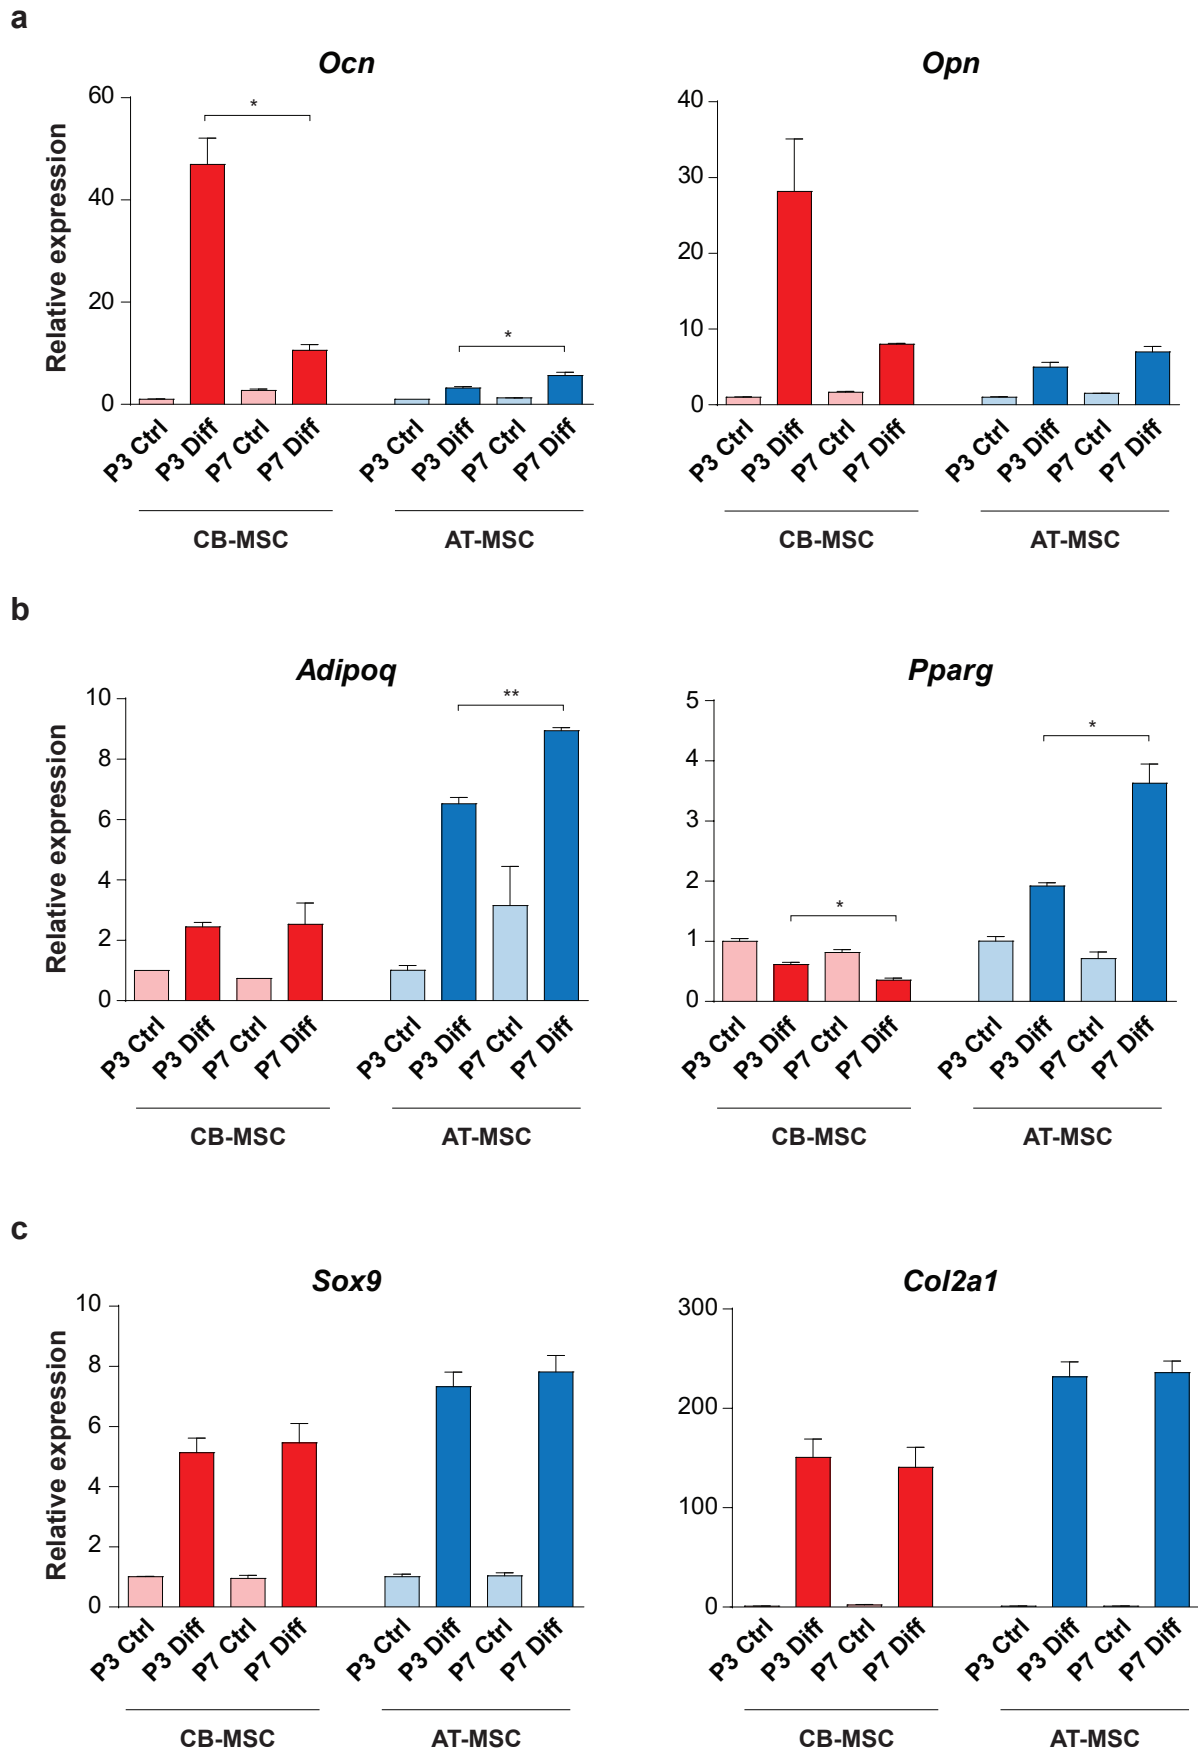

**Figure S2.** Expression of lineage marker genes in the differentiated MSCs with reference to  $\beta$ -Actin gene. **(a)** Osteogenic markers, *Ocn* and *Opn*, **(b)** adipogenic markers, *Adipoq* and *Pparg*, and **(c)** chondrogenic markers, *Sox9* and *Col2a1*, were used to determine the multi-lineage differentiation of AT-MSCs and CB-MSCs. MSCs cultured in basic medium without differentiation agents for the same period of time were served as controls. Gene expressions were normalized with housekeeping gene  $\beta$ -Actin. Experiments were performed with three replicates. Data represent mean  $\pm$  SD; \* $p$  < 0.05 and \*\* $p$  < 0.01.
