# Supplementary material for: Murine Mesenchymal Stromal Cells Retain Biased Differentiation Plasticity Towards Their Tissue of Origin
Source: MDPI journal article supplement (doi:10.3390/cells9030756), 2020-03-19
Supplement: s1 [file s1]

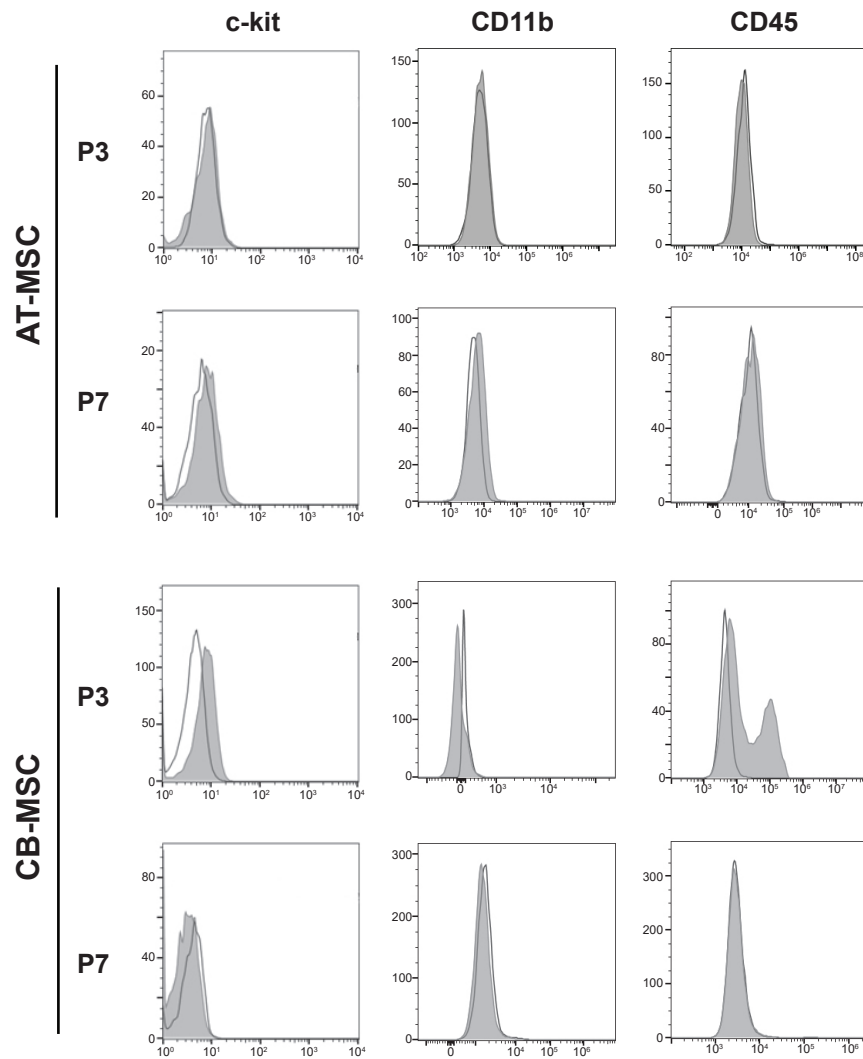

**Figure S1.** Immunophenotypes of hematopoietic markers on MSCs. Cell surface markers, c-kit, CD11b, and CD45, were used to characterize AT-MSC and CB-MSC at passage 3 (P3) and 7 (P7), respectively. Representative flow cytometry patterns were shown. Shaded peaks represent antibody-labeled population; blank peaks represented isotype controls.
