# Supplementary material for: Murine Mesenchymal Stromal Cells Retain Biased Differentiation Plasticity Towards Their Tissue of Origin
Source: MDPI journal article supplement (doi:10.3390/cells9030756), 2020-03-19
Supplement: s1 [file s1]

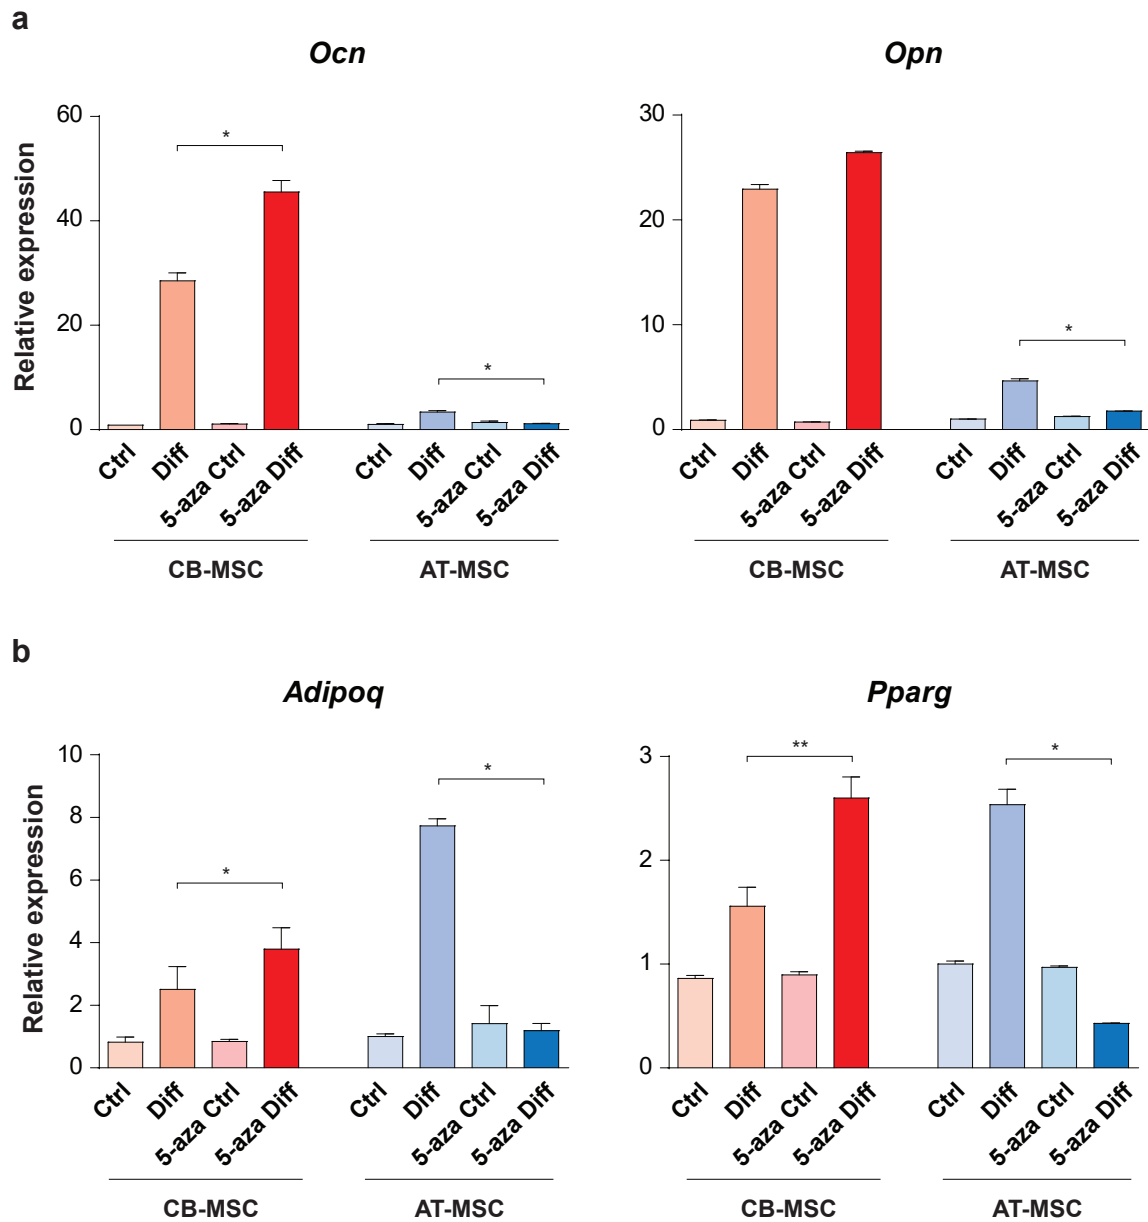

**Figure S3.** Expression of lineage marker genes in the differentiated 5-aza-treated MSCs with reference to  $\beta$ -Actin gene. The expression of **(a)** osteocyte markers (*Ocn* and *Opn*) and **(b)** adipocyte markers (*Adipoq* and *Pparg*) were determined by qRT-PCR. MSCs cultured in basic medium without differentiation agents for the same period of time were served as controls. Gene expressions were normalized with housekeeping gene  $\beta$ -Actin. Experiments were performed with three replicates. Data represent mean  $\pm$  SD; \* $p < 0.05$  and \*\* $p < 0.01$ .
